# Supplementary material for: IRF4-activated TEX41 promotes the malignant behaviors of melanoma cells by targeting miR-103a-3p/C1QB axis
Source: BMC Cancer. 2021 Dec 16;21:1339. doi: 10.1186/s12885-021-09039-1 (PMC8680380; doi:10.1186/s12885-021-09039-1)
Supplement: Supplementary file 4 — Additional file 4: Supplementary Table 1. Primer sequences involved in qRT-PCR were listed. [file 12885_2021_9039_MOESM4_ESM.xlsx]

## Sheet: Sheet1
Gene name	Primer sequences
TEX41	F：CGTGTCTACACTGGCATGGT
	R：TCTGGCTATGGGTGTACTGGA
FOXM1	F：ATCTTTCTTTGTTTATCAGTGCTGC
	R：CCACTTTGATGGGTCTCGCT
IRF4	F：AAGCCTTGGCGTTCTCAGAC
	R：TCTGGCACAGTCTTTTCGCA
FOXD3	F：GACATGTTCGACAACGGCAG
	R：CTGTAAGCGCCGAAGCTCTG
TEX41 promoter	F：TAACGTGGCAACCTGAGACT
	R：GAAATGGGCCACAGGTGAATG
BST2	F：TGTCGCAATGTCACCCATCT
	R：ATCACAGTGTGGTTGCAGGT
C1QB	F：GCTGGAGACCATGGTGAGTT
	R：CTGGGTGGCCTTGTAGTCTC
GAPDH	F：CTCTGCTCCTCCTGTTCGAC
	R：TTCCCGTTCTCAGCCTTGAC
U6	F：TCCCTTCGGGGACATCCG
	R：AATTTTGGACCATTTCTCGATTTGT
miR-15a-5p	F：GCCGAGtagcagcacataat
	R：CTCAACTGGTGTCGTGGA
miR-15b-5p	F：GCCGAGatgatgtgctgcta
	R：CTCAACTGGTGTCGTGGA
miR-103a-3p	F：GCCGAGctgtacaatgctgct
	R：CTCAACTGGTGTCGTGGA
miR-885-5p	F：GCCGAGggtagtgtaatgga
	R：CTCAACTGGTGTCGTGGA
